# Intracerebral Administration of Recombinant Rabies Virus Expressing GM-CSF Prevents the Development of Rabies after Infection with Street Virus

Hualei Wang<sup>1,2,3</sup>, Guoqing Zhang<sup>1</sup>, Yongjun Wen<sup>1</sup>, Songtao Yang<sup>2</sup>, Xianzhu Xia<sup>2</sup>, Zhen F. Fu<sup>1,4,5\*</sup>

**1** Department of Pathology, University of Georgia, Athens, Georgia, United States of America, **2** Institute of Veterinary Medicine, Chinese Academy of Military Medical Sciences, Changchun, Jilin, China, **3** College of Animal Science and Veterinary Medicine, Jilin University, Changchun, Jilin, China, **4** Department of Infectious Diseases, University of Georgia, Athens, Georgia, United States of America, **5** State Key Laboratory of Agricultural Microbiology, Huazhong Agricultural University, Wuhan, China

## Abstract

Recently it was found that prior immunization with recombinant rabies virus (RABV) expressing granulocyte-macrophage colony-stimulating factor (GM-CSF) (LBNSE-GM-CSF) resulted in high innate/adaptive immune responses and protection against challenge with virulent RABV (Wen et al., *JVI*, 2011). In this study, the ability of LBNSE-GM-CSF to prevent animals from developing rabies was investigated in mice after infection with lethal doses of street RABV. It was found that intracerebral administration of LBNSE-GM-CSF protected more mice from developing rabies than sham-treated mice as late as day 5 after infection with street RABV. Intracerebral administration of LBNSE-GM-CSF resulted in significantly higher levels of chemokine/cytokine expression and more infiltration of inflammatory and immune cells into the central nervous system (CNS) than sham-administration or administration with UV-inactivated LBNSE-GM-CSF. Enhancement of blood-brain barrier (BBB) permeability and increases in virus neutralizing antibodies (VNA) were also observed in mice treated with LBNSE-GM-CSF. On the other hand, intracerebral administration with UV-inactivated LBNSE-GM-CSF did not increase protection despite the fact that VNA were induced in the periphery. However, intracerebral administration with chemoattractant protein-1 (MCP-1, also termed CCL2) increased significantly the protective efficacy of UV-inactivated LBNSE-GM-CSF. Together these studies confirm that direct administration of LBNSE-GM-CSF can enhance the innate and adaptive immunity as well as the BBB permeability, thus allowing infiltration of inflammatory cells and other immune effectors enter into the CNS to clear the virus and prevent the development of rabies.

**Citation:** Wang H, Zhang G, Wen Y, Yang S, Xia X, et al. (2011) Intracerebral Administration of Recombinant Rabies Virus Expressing GM-CSF Prevents the Development of Rabies after Infection with Street Virus. *PLoS ONE* 6(9): e25414. doi:10.1371/journal.pone.0025414

**Editor:** Dipshikha Chakravorty, Indian Institute of Science, India

**Received:** June 30, 2011; **Accepted:** September 2, 2011; **Published:** September 28, 2011

**Copyright:** © 2011 Wang et al. This is an open-access article distributed under the terms of the Creative Commons Attribution License, which permits unrestricted use, distribution, and reproduction in any medium, provided the original author and source are credited.

**Funding:** This work is supported partially by Public Health Service grant AI-051560 from the National Institute of Allergy and Infectious Disease. No additional external funding was received for this study. The funders had no role in study design, data collection and analysis, decision to publish, or preparation of the manuscript.

**Competing Interests:** The authors have declared that no competing interests exist.

\* E-mail: zhenfu@uga.edu

## Introduction

Rabies is one of the oldest zoonotic diseases and today it continues to present a serious burden to the public health and the global economy. It causes more than 55,000 human deaths and more than 15 million people undergo post-exposure prophylaxis (PEP) every year around the globe [1], which is responsible for 1.74 million disability adjusted life year score (DALYs) lost [2]. Most of the human cases occur in the developing countries of Asia and Africa where canine rabies is endemic and resources are limited [3]. In more developed countries, human rabies has dramatically declined during the past 60 years as a direct consequence of routine vaccination of pet animals [4]. However, wildlife rabies has emerged as a major threat. In the United States, more than 90% of animal rabies cases have been reported in wildlife such as raccoons, bats, skunks and foxes [5,6]. Although there have been incidents in which large carnivores transmit rabies directly to humans [7,8], most of the human cases (>90%) in the past two decades are associated with rabies virus (RABV) found in bats, particularly the silver-haired bats (SHBRV) [8,9,10]. Unlike classical rabies, which is inflicted by the bite of an infected

animal, these newly emerging human rabies infections occurred without a known history of exposure [8]. As a result, PEP with vaccines and anti-rabies immunoglobulin could not be initiated. This combined treatment is effective when it is initiated within a few days (but as soon as possible) [11]. However, delayed treatment with rabies vaccines currently in use may actually accelerate the development of rabies [12]. It is widely accepted that there is no proven effective treatment and rabies is almost invariably fatal once clinical symptoms of rabies develop [12]. Thus new modalities are needed to prevent and treat clinical rabies.

Recently it was found that activation of the innate immunity, particularly type I interferon (IFN) and chemokines, is one of the mechanisms by which RABV is attenuated [13]. Furthermore, infection with rRABV expressing chemokines/cytokines resulted in further attenuation of viral virulence and enhancement of innate and adaptive immunity by inducing the expression of innate immune molecules, the infiltration of inflammatory cells into the CNS, and the enhancement of BBB permeability [14]. For example, prior immunization with rRABV expressing chemokines/cytokines MDC (macrophage-derived chemokine) or GM-CSF (granulocyte-macrophage colony-stimulating factor) induced

significantly more VNA responses in mice, which led to better protection than with the parent virus when challenged with virulent RABV [15,16]. Yet, these rRABVs did not induce any overt disease or death in adult mice when  $10^7$  fluorescent focus unit (FFU) was directly inoculated by the intracerebral (ic) route [16]. In the present study, rRABV expressing GM-CSF (LBNSE-GM-CSF) was used to treat mice at different days after an intramuscular infection with a lethal dose of street RABV. It was found that direct intracerebral administration of LBNSE-GM-CSF could induce innate and adaptive immune responses, allowing immune effectors enter into the CNS to clear the virus and prevent the development of rabies as late as 5 days after infection.

## Results

### Treatment with LBNSE-GM-CSF can prevent mice from developing rabies as late as 5 days after infection with street RABV

Our previous studies indicated that rRABVs expressing chemokines/cytokines, e.g. GM-CSF or MDC, activate/recruit DCs and enhance protective immune responses when given before challenge [16]. To investigate whether these rRABVs could prevent mice from developing rabies when administered after challenge, ICR mice were inoculated by intramuscular (im) route with 10 50% intramuscular mouse lethal dose (IMLD<sub>50</sub>) of street RABV (DRV) and then treated with  $10^7$  FFU of LBNSE-GM-CSF by ic route at 2, 4, 5, and 6 days post infection (dpi). Mice were monitored daily for 20 days for developing disease and death. By dpi 6 to 8, animals began to develop clinical sign such as ruffled fur; trembling and shaking; incoordinated movement; and paralysis. Mice were humanely sacrificed when developing complete paralysis by dpi 10 to 13. As shown in Fig. 1A, 80% of the mice infected with DRV by im, but treated with medium by ic at 2 dpi developed rabies and succumbed to infection by 14 dpi. None of DRV-infected mice developed any clinical symptom when treated by ic with LBNSE-GM-CSF at 2 dpi. Significantly more mice (70%) survived the infection when treated with LBNSE-GM-CSF at 4 dpi ( $p < 0.01$ ). When the treatment was initiated at 5 dpi, 60% of the mice survived and this is significant when compared to sham-treated. When the treatment was initiated at 6 dpi, 40% of the mice were protected, but no significant difference was found when compared with sham-treated mice. These data indicate that LBNSE-GM-CSF can prevent mice from developing rabies when administered ic as late as 5 dpi. To further investigate if ic administration of UV-inactivated LBNSE-GM-CSF has the same ability to prevent animals from developing rabies, mice were infected with DRV and treated with the same amount (equivalent to  $10^7$  FFU) of UV-inactivated LBNSE-GM-CSF at 4 dpi (Fig. 1E). No significantly more protection was observed in mice treated with UV-inactivated LBNSE-GM-CSF than in sham-treated mice, indicating that treatment with UV-inactivated virus is not able to prevent rabies in the mouse model.

To address if the LBNSE-GM-CSF is also efficacious when administered by other routes, mice were infected by im with 10 IMLD<sub>50</sub> DRV and treated with  $10^7$  FFU LBNSE-GM-CSF at 0, 2, or 4 dpi by im (Fig. 1B), intradermal (Fig. 1C) or intranasal (Fig. 1D) route. All the infected and sham-treated mice died while no mortality was observed in mice when LBNSE-GM-CSF was administered at 0 dpi by each route. Significantly more protection ( $p < 0.01$  or  $p < 0.05$ ) was observed when mice were treated at 2 dpi (40–50%). No significant protection was observed when treatment was initiated by 4 dpi, indicating that peripheral route is not as

effective as the ic route of administration for treatment with LBNSE-GM-CSF.

### Treatment with LBNSE-GM-CSF cleared RABV from the CNS

To investigate if treatment with LBNSE-GM-CSF leads to virus clearance from the CNS, DRV-infected mice were treated ic at 4 dpi with  $10^7$  FFU LBNSE-GM-CSF or UV-inactivated LBNSE-GM-CSF (equivalent to  $10^7$  FFU). Brains were harvested and virus titers determined at days 3, 6, 9 after treatment (Table 1). Higher virus titers were detected in the sham-treated mice or mice treated with UV-inactivated LBNSE-GM-CSF at day 6 and 9 post treatment. In LBNSE-GM-CSF-treated group, virus was detected in all three mice at day 3, none at day 6, and only one mouse at day 9 post treatment (with low titer). These data indicate that treatment with LBNSE-GM-CSF not only results in clearance of the recombinant virus, but also street RABV from the CNS.

### Treatment with LBNSE-GM-CSF induced expression of chemokines and cytokines in the brain

To determine the mechanism(s) by which treatment with LBNSE-GM-CSF clears RABV from the brain, the expression of chemokine and cytokine (MIP-1 alpha, RANTES, IP-10, MCP-1, IL-6, and IFN-gamma) mRNA was measured by qRT-PCR in the brain. In mice infected with DRV and treated with LBNSE-GM-CSF at the same time (Fig. 2A), the expression level of all these chemokines/cytokines was highly up-regulated at day 3 post treatment. By day 6 post treatment, the expression level for most of these chemokines/cytokines was reduced drastically although remained significantly higher than in mice sham-treated or treated with UV-inactivated LBNSE-GM-CSF. However, the level of RANTES expression remained elevated and the level of IFN-gamma expression reached a peak by day 6 post treatment. By day 9 post treatment, only RANTES remains at high level in mice infected with DRV and treated with LBNSE-GM-CSF. On the other hand, high levels of IP-10, MCP-1, and IL-6 were detected in mice infected with DRV, but sham-treated, by day 9 post treatment.

When the treatment was initiated at 4 dpi, the expression level of chemokines/cytokines was significantly higher in the brain of mice treated with LBNSE-GM-CSF than in mice sham-treated or treated with UV-inactivated LBNSE-GM-CSF (Fig. 2B) at day 3 post treatment. By days 6 and 9 post treatment (10 and 13 dpi), however, significantly higher levels of chemokines, particularly MIP-1 alpha, IP-10 and MCP-1 were detected in the brain of mice sham-treated or treated with UV-inactivated LBNSE-GM-CSF than in mice treated with live LBNSE-GM-CSF. For RANTES and IFN-gamma, the level was significantly higher in mice treated with LBNSE-GM-CSF at day 6, but not at day 9 post treatment.

Overall, these data indicate that direct ic administration of LBNSE-GM-CSF is capable of inducing high and transient expression of chemokines/cytokines in the CNS at day 3 post treatment (early innate immune responses). On the other hand, DRV only is capable of inducing expression of chemokine/cytokine at late stage of infection (9 dpi or later). Direct ic administration of UV-inactivated LBNSE-GM-CSF does not induce chemokine/cytokine expression.

### Treatment with LBNSE-GM-CSF induced infiltration of inflammatory cells into the mouse brain

To investigate if expression of chemokines/cytokines leads to infiltration of inflammatory cells into the CNS, flow cytometry

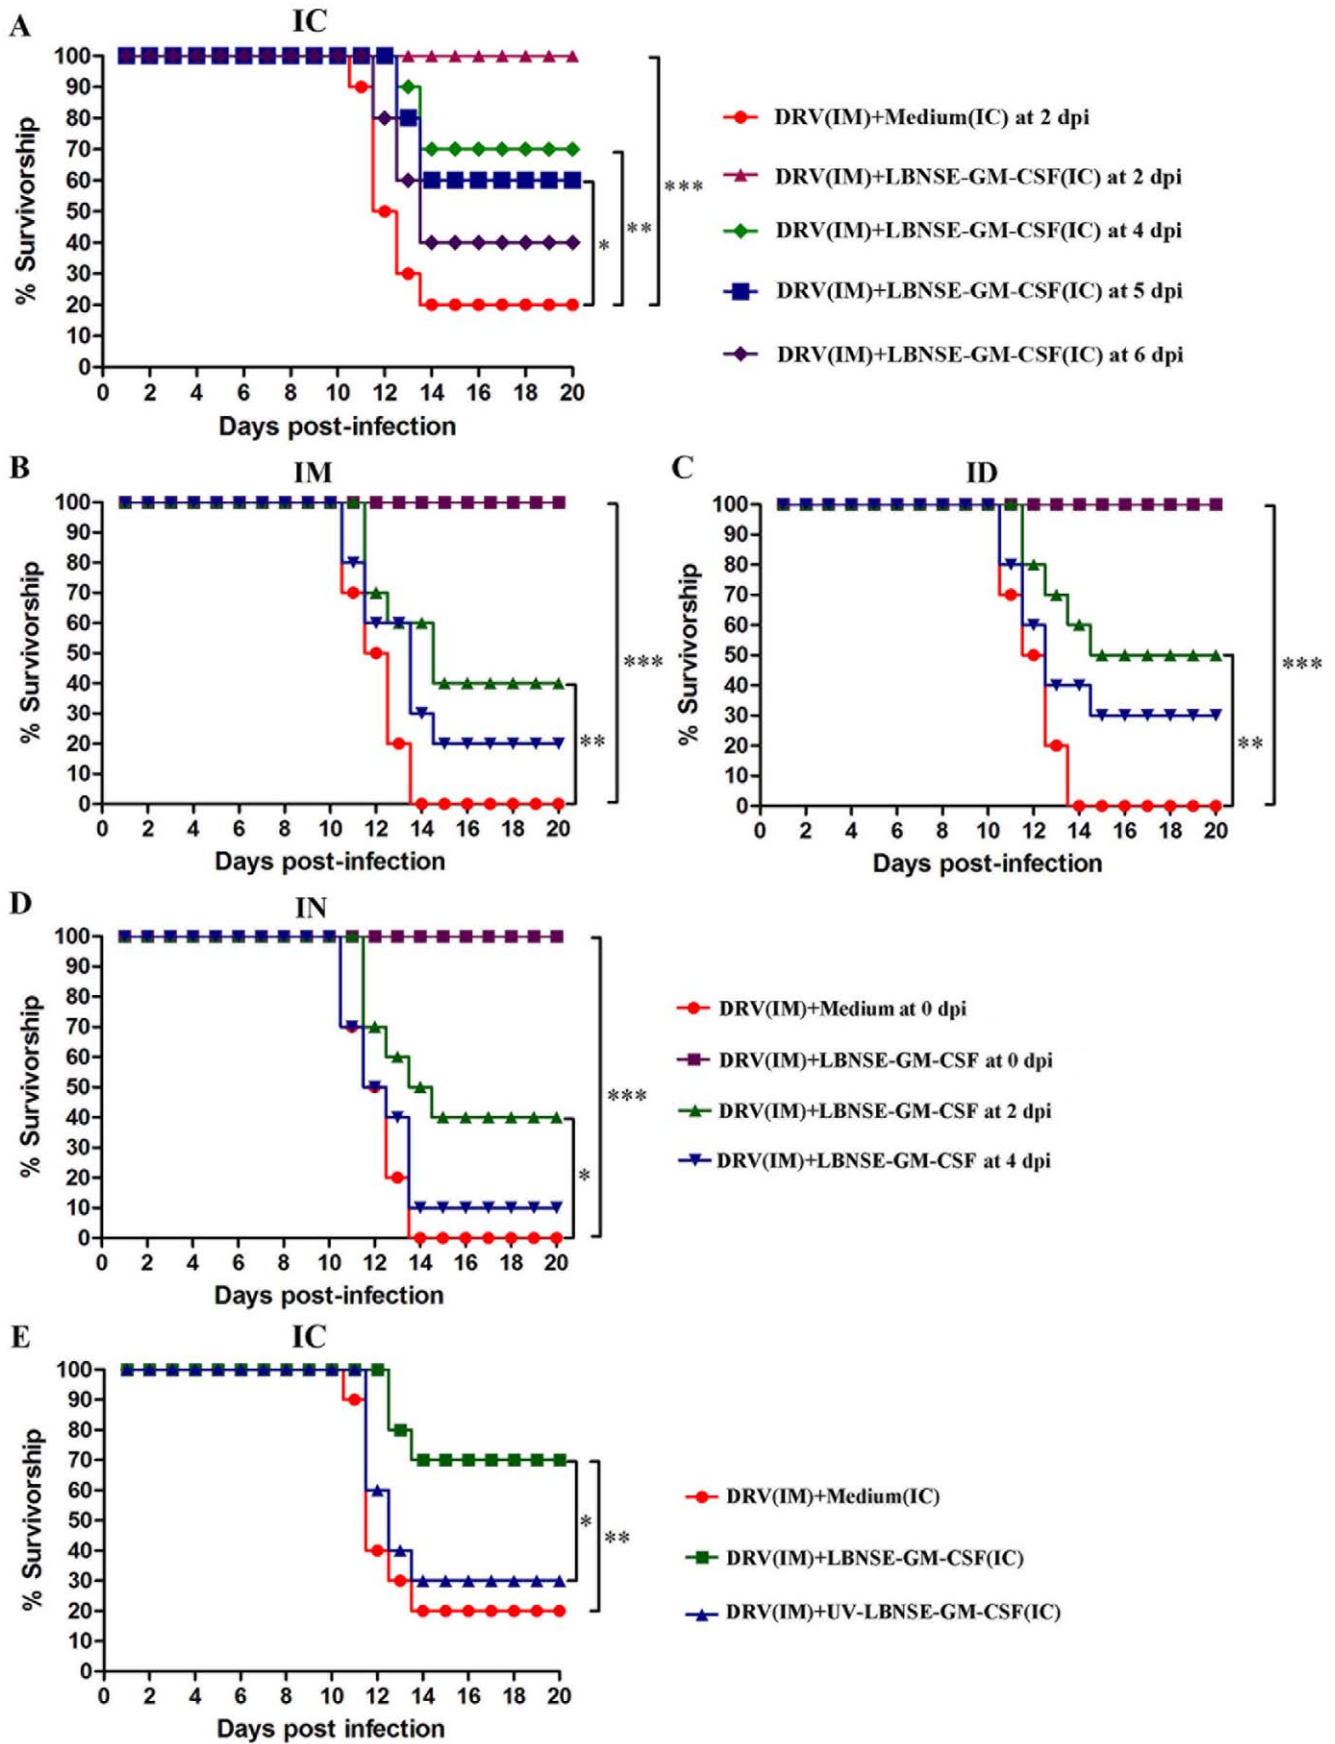

**Figure 1. Protective efficacy of recombinant RABVs administrated after infection i.m. with DRV.** ICR mice (group of 10) at age of 4–6 weeks were infected i.m. with  $10^7$  IMLD<sub>50</sub> DRV, and treated with  $10^7$  FFU LBNSE-GM-CSF by intracerebral (A), intramuscular (B), intradermal (C) or intranasal (D) route at different time point post infection, or treated with live or UV-inactivated LBNSE-GM-CSF at day 4 post infection (E). Infected and treated mice were observed daily for 20 days and survivorship was recorded and analyzed. Asterisk indicates significant differences between the indicated experimental groups as calculated by Log-rank test: \*,  $p < 0.05$ ; \*\*,  $p < 0.01$ ; \*\*\*,  $p < 0.001$ . doi:10.1371/journal.pone.0025414.g001

was performed to analyze the leukocytes infiltrated into the mouse brain at days 3, 6, 9 post treatment. Fig. 3A shows representative flow cytometric plots of neutrophils (Ly6G+ and CD45+), activated microglia/macrophages (CD11b+ and CD45+) and CD3+ T cells (CD3+ and CD45+) from brain of mice infected with DRV and treated with LBNSE-GM-CSF. Detailed data are presented in Fig. 3B for mice infected with DRV and treated at the same time and in Fig. 3C for mice infected with DRV and treated at 4 dpi. Significantly more infiltration of activated microglia/macrophages ( $p < 0.01$ ), neutrophils ( $p < 0.01$ ) and CD3+ T cells ( $p < 0.01$ ) was observed in mice infected with DRV and treated with LBNSE-GM-CSF than in mice infected with DRV and sham-treated or treated with UV-inactivated LBNSE-GM-CSF at days 3, 6, 9 post treatment (Fig. 3B, 3C). These data indicate that inflammatory cells were trafficking to and accumulating in the CNS of mice treated with live LBNSE-GM-CSF.

#### Treatment with LBNSE-GM-CSF resulted in the enhancement of BBB permeability

Previous studies have demonstrated that enhancement of BBB permeability is one of the important mechanisms by which the immune effectors can enter into the CNS to clear RABV [17,18,19]. To investigate if treatment with LBNSE-GM-CSF enhances BBB permeability, the leakage of sodium fluorescein (NaF) from the circulation into CNS tissues was measured in the cerebrum, cerebellum or spinal cord at day 6 post treatment. As shown in Fig. 4A, BBB permeability to NaF was significantly elevated in the cerebrum and cerebellum of mice treated with LBNSE-GM-CSF with or without prior infection with DRV when compared with that in sham-treated mice or in mice treated with UV-inactivated LBNSE-GM-CSF. When the treatment was initiated 4 dpi, significantly more increase in BBB permeability was detected in the cerebrum of mice treated with LBNSE-GM-CSF than in mice sham-treated or treated with UV-inactivated LBNSE-GM-CSF (Fig. 4B). On the other hand, BBB permeability of mice infected with DRV without treatments or treated with UV-inactivated LBNSE-GM-CSF was enhanced. These data indicate that indeed treatment with LBNSE-GM-CSF enhances the BBB permeability in the CNS (cerebrum and cerebellum) at day 6 post treatment. Street RABV alone is only capable of enhancing the BBB permeability in the spinal cord at late stage of infection (10 dpi).

#### Treatment with LBNSE-GM-CSF resulted in recruitment/activation of DCs and B cells

To investigate if stimulation of innate immunity (expression of chemokines/cytokines and infiltration of inflammatory cells) enhances the adaptive immunity, the recruitment/activation of DCs and B cells was analyzed by flow cytometry using antibodies to cell surface markers (CD11c, CD86 and CD80 for activated DCs, CD19 and CD40 for B cells). Fig. 5 shows recruitment/activation of DC in mice infected and treated at the same time (Fig. 5A) or treated at 4 dpi (Fig. 5B). Significantly more DCs (CD11c+) were detected at days 3 and 6 post treatment in mice treated with LBNSE-GM-CSF than in sham-treated mice or mice treated with UV-inactivated LBNSE-GM-CSF. Expression level of activated DC markers (CD80 and CD86) was significantly up-regulated at days 3 and 6 post treatment in mice treated with LBNSE-GM-CSF than in sham-treated mice or in mice treated with UV-inactivated virus as shown by the geometric mean fluorescence (data not shown). By day 9 post treatment, the activation of DC subsided and no significant difference was found among the different groups.

Fig. 6 shows recruitment/activation of B cells in the brain, lymph nodes and blood in mice infected and treated at the same time (Fig. 6A) or in mice treated at 4 dpi (Fig. 6B). Significantly more B cells were detected during the investigation period (days 3 to 9 post treatment) in the brain and lymph node and in the blood (at days 6 and 9 post treatment) of mice treated with LBNSE-GM-CSF than sham-treated mice or mice treated with UV-inactivated LBNSE-GM-CSF. Taken together, our data indicate that ic treatment with LBNSE-GM-CSF can recruit/activate more DCs and B cells both in CNS and periphery than treatment with medium or UV-inactivated LBNSE-GM-CSF.

#### Treatment with LBNSE-GM-CSF enhances the production of virus neutralizing antibodies (VNA)

To investigate if recruitment/activation of DCs and B cells lead to enhanced production of VNA, blood samples were collected from mice at days 6 and 9 post treatment and VNA determined by the RFFIT assay [20]. As shown in Fig. 6C, VNA titers were below 0.5 IU in DRV-infected and sham-treated mice at 6 and 9 dpi. In mice infected with DRV and treated with UV-inactivated LBNSE-GM-CSF, VNA titers were low (1.78 IU) at 6 but increased to 4.72 IU by 9 dpi (Fig. 6C). Mice treated with LBNSE-GM-CSF produced high level of VNA both at 6 (12.01 IU) and 9 dpi

**Table 1. Virus titers in the brain of mice infected im with DRV ( $10^7$  IMLD<sub>50</sub>) and treated with rRABVs at 4 dpi.**

| Treatment | Medium                           | rRABV (GM-CSF) *                 | UV-inactivated rRABV (GM-CSF)* |
|-----------|----------------------------------|----------------------------------|--------------------------------|
| D3        | -†, -, -                         | $10^{2.5}$ , $10^2$ , $10^{2.5}$ | -, -, -                        |
| D6        | $10^{4.5}$ , $10^{3.5}$ , $10^5$ | -, -, -                          | $10^4$ , $10^{3.5}$ , $10^4$   |
| D9        | $10^5$                           | $10^3$ , -, -                    | $10^5$ , $10^3$ , $10^4$       |

\*rRABV (GM-CSF), recombinant RABV expressing GM-CSF.

†Virus titer in the brain (FFU/g tissue).

- No virus was detected.

doi:10.1371/journal.pone.0025414.t001

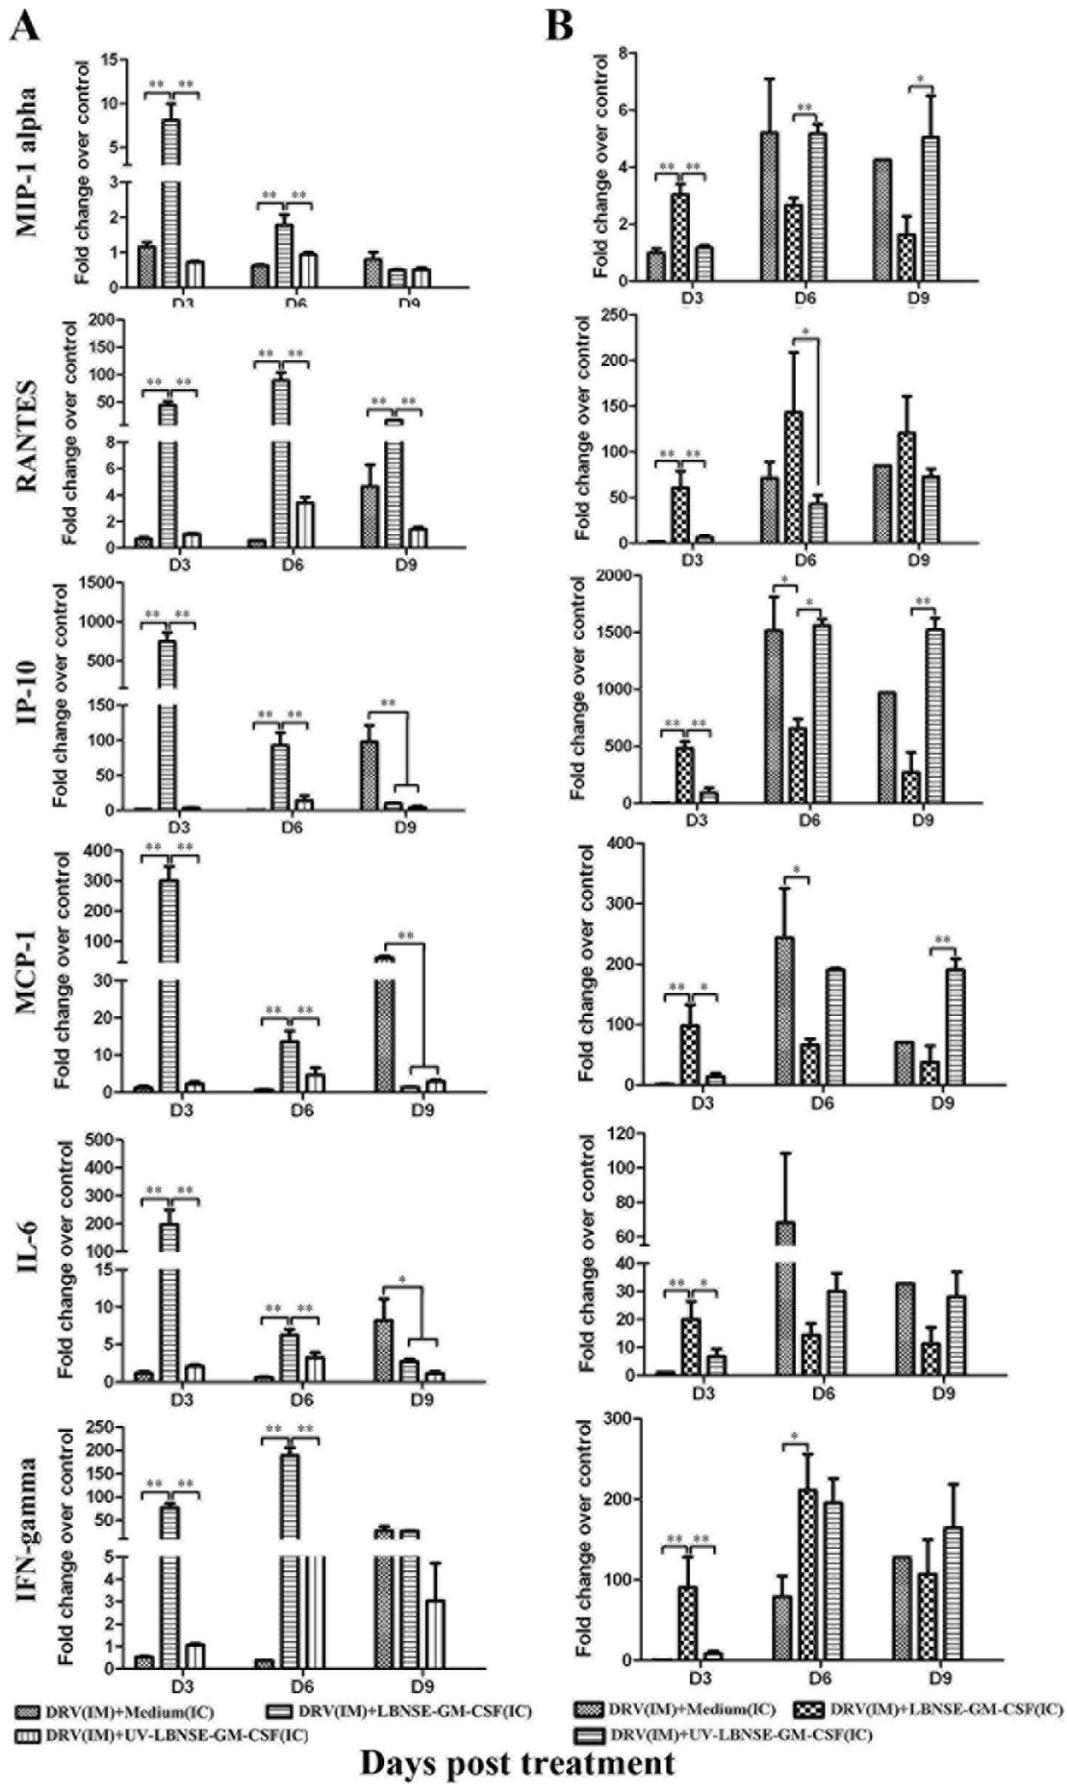

**Figure 2. Concentration of chemokines and cytokines in the brain of mice treated with LBNSE-GM-CSF.** BALB/c mice were infected with 10 IMLD<sub>50</sub> DRV and treated at either 0 (A) or 4 (B) dpi with medium, 10<sup>7</sup> FFU live or UV-inactivated LBNSE-GM-CSF, brain samples were collected at days 3, 6, and 9 post treatment. Total RNA was extracted from the brain tissue and mRNA of chemokines and cytokines was analyzed by qRT-PCR. The mRNA copy number was normalized to the housekeeping gene GAPDH. Levels of gene expression in a test sample are presented as the fold change over that detected in sham-infected controls. Data represent the average from three independent experiments. Asterisk indicates significant differences between the indicated experimental groups as calculated by one-way ANOVA: \*,  $p < 0.05$ ; \*\*,  $p < 0.01$ . doi:10.1371/journal.pone.0025414.g002

(increased to 17.67 IU) (Fig. 6C). When the treatment was initiated at 4 dpi, the VNA titers did not increase from day 6 to 9 post treatment in DRV-infected and sham-treated mice (1.13 to 1.43 IU) or in mice infected with DRV and treated with UV-inactivated LBNSE-GM-CSF (2.71 to 2.81 IU) (Fig. 6D). High VNA titers were induced in mice treated with LBNSE-GM-CSF at days 6 (7.36 IU) and 9 post treatment (increased to 8.48 IU) (Fig. 6D). These data indicate that treatment with LBNSE-GM-CSF induced significantly higher adaptive immunity as shown by VNA titers than sham-treated mice or mice treated with UV-inactivated LBNSE-GM-CSF. Nevertheless, treatment with UV-inactivated LBNSE-GM-CSF also induced relatively high level of VNA titers in the periphery.

### Enhancing the BBB permeability with MCP-1 improved the survival of mice treated with UV-inactivated LBNSE-GM-CSF

All the above results indicate that LBNSE-GM-CSF induces the expression of innate immune molecules, infiltration of inflammatory cells into the CNS, and enhancement of BBB permeability, all of which facilitates immune effectors enter into the CNS and promotes viral clearance. To further confirm that expression of cytokines/chemokines is a direct mechanism for enhancement of BBB permeability, ICR mice were inoculated by im with 10IMLD<sub>50</sub> DRV and then treated with medium, MCP-1 (25 µg), 10<sup>7</sup> FFU LBNSE-GM-CSF, UV-inactivated LBNSE-GM-CSF (equivalent to 10<sup>7</sup> FFU) or a mixture of MCP-1 (25 µg) and UV-inactivated LBNSE-GM-CSF by ic at 4 dpi. Mice were monitored daily for developing diseases and deaths. As shown in Fig. 7, treatment with MCP-1 alone enhanced BBB permeability at day 2 post treatment (Fig. 7A), but did not induce any disease while 100% of the mice infected with DRV by im and treated with medium developed rabies and succumbed to the infection by 14 dpi (Fig. 7B). Treatment with MCP-1 increased the survival to 30% in mice infected with DRV, although no significant difference was found between these two groups. Treatment with MCP-1 increased significantly ( $p < 0.05$ ) the survival rate from 10% to 50% in mice infected with DRV and treated with UV-inactivated LBNSE-GM-CFS. As shown above, 60% of the mice infected with DRV and treated with LBNSE-GM-CSF survived (Fig. 7B). These data indicate that enhancement of BBB permeability allowed immune effectors induced by LBNSE-GM-CSF in the periphery infiltrate into the CNS and help clear RABV from the CNS, thereby preventing mice from developing rabies.

### Discussion

Viral infection of the CNS poses unique challenges to the immune system with regards to controlling and eliminating the invading pathogens. Traditionally, the CNS is considered an immunologically privileged site [21] and the presence of a BBB provides a physical and physiological barrier for cells and molecules to enter into the CNS [22]. Although enhancement of BBB permeability and infiltration of inflammatory cells have often been associated with pathological changes in the CNS when

infected by viruses [22,23], transiently increased BBB permeability has been found to be helpful in clearing RABV from the CNS [19,24]. Induction of an autoimmune CNS inflammatory response resulted in increasing BBB permeability and aided RABV clearance [19]. Expression of triple G in SPBAAN (a recombinant RABV SAD strain) also has the ability to enhance BBB permeability and prevent infected animals from developing rabies [25]. In the present study, we showed that direct administration of chemokines or rRABV expressing GM-CSF into the CNS could help clear RABV from the CNS and prevent mice infected with street RABV from developing rabies. However, administration of rRABV via peripheral routes is not as effective as the ic route and this may be due to the quicker induction of proinflammatory mediators in the CNS by direct ic administration, which impacts the change of the BBB permeability faster than other routes of administration.

Proinflammatory mediators such as chemokines and cytokines have a prominent role in enhancement of the BBB permeability during inflammatory responses [26,27,28]. In fact, expression of chemokines early in response to infection with neurotropic viruses aids in effective host defense by promoting vascular permeability and regulating parenchymal lymphocyte infiltration [22]. In the present study, chemokine alone or cytokines expressed by rRABV are used to enhance the BBB permeability. This was based on studies by us [13,17] and others [29,30] that laboratory-adapted RABV induced high expression of innate immune genes (particularly chemokines and IFN) while street RABV did not. It is thus hypothesized that expression of chemokines and IFN is one of the mechanisms by which RABV is attenuated [13,17]. Over-expression of chemokines (MIP-1 alpha, RANTES, or IP-10) by rRABV has been found to enhance BBB permeability [14]. In the present study, it shows that over-expression of GM-CSF also enhances the BBB permeability. It is known that expression of chemokines/cytokines results in recruitment of inflammatory cells into the CNS which enhances BBB permeability [22]. Indeed direct administration of LBNSE-GM-CSF into the CNS stimulated high level expression of chemokines/cytokines (at day 3 post treatment), infiltration of inflammatory cells (neutrophils, activated microglia/macrophages and T lymphocytes at day 3–9 post treatment), and enhancement of BBB permeability (at day 6 post treatment). Direct administration of a chemokine (MCP-1) into the CNS also resulted in enhancement of BBB permeability, further supporting the role of chemokines/cytokines in the enhancement of BBB permeability.

It is apparent that enhancement of BBB permeability alone is not sufficient to prevent mice from developing rabies since administration of MCP-1 alone did not significantly increase the survival of mice infected with DRV despite the fact that BBB permeability was increased significantly in the cerebrum 2 days after administration. We believe that this might be due to the low RABV-specific immunity (VNA) in the mice infected with DRV (1.13 to 1.43 IU at 10 and 13 dpi). However, administration of MCP-1 did significantly improve protection in animals infected with DRV and treated with UV-inactivated LBNSE-GM-CSF (2.71 to 2.81 IU at 10–13 dpi). In fact the rate of protection (50%) in mice treated with MCP-1 and UV-inactivated LBNSE-GM-



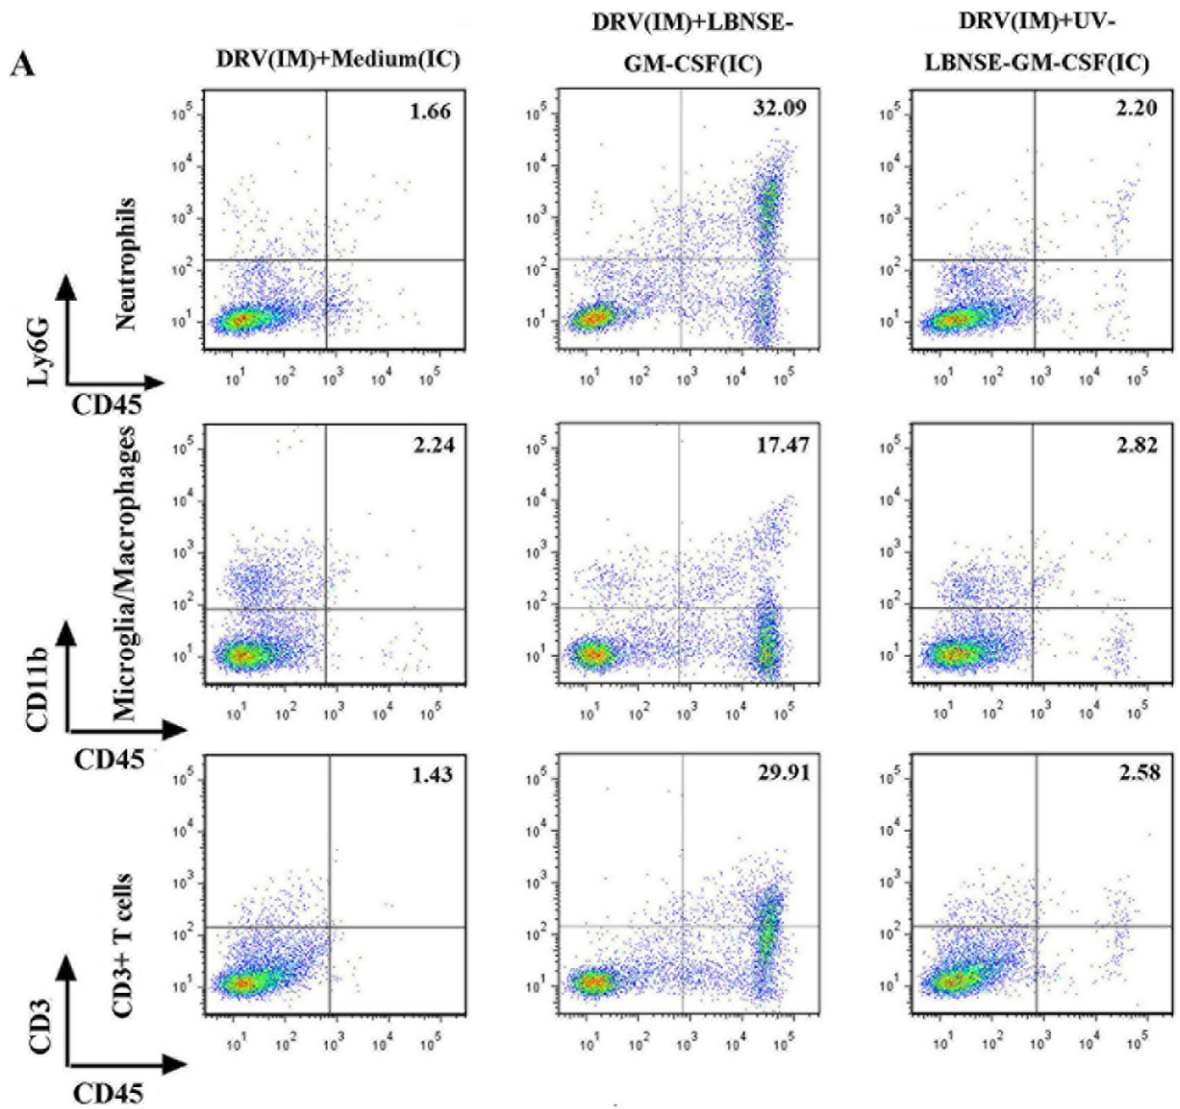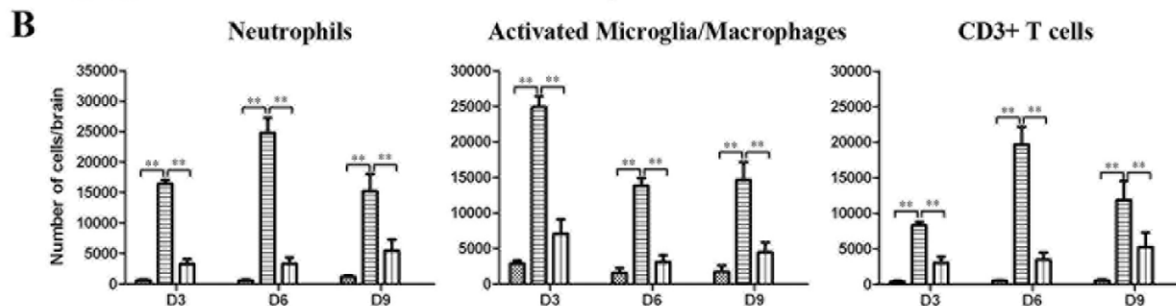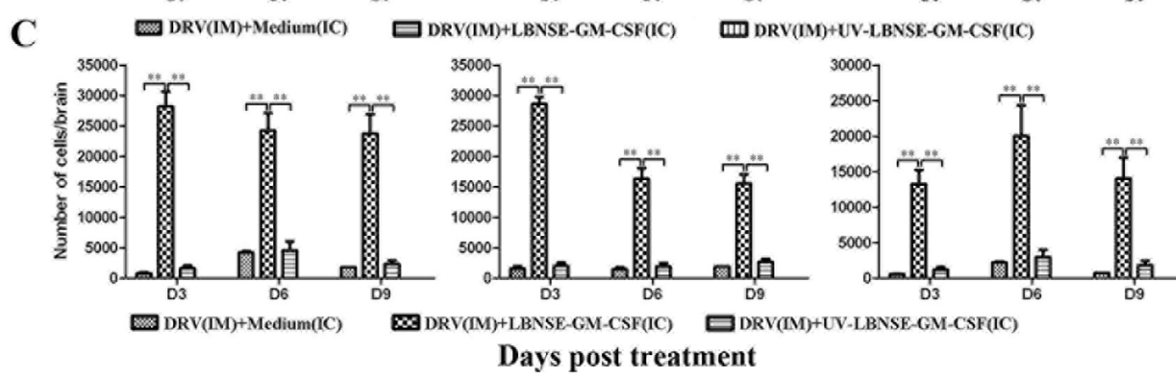

**Figure 3. Differentiation of inflammatory cells infiltrated into CNS by flow cytometric analyses.** BALB/c mice were infected i.m. with 10 IMLD<sub>50</sub> DRV and were treated at either 0 or 4 dpi with medium, 10<sup>7</sup> FFU live or inactivated LBNSE-GM-CSF. Leukocytes from CNS were recovered by Percoll centrifugation and stained with cell surface markers CD11b (Microglia/macrophage), Ly6G (Neutrophils) and CD3 (T cells). The stained cells were analyzed by flow cytometry. Representative flow cytometric plots of infiltrated cells in mouse brain at day 6 post treatment for each of the treatment groups (A). The absolute numbers of indicated inflammatory cells in the brain were presented for mice treated at day 0 (B) or 4 (C) dpi, respectively. All data are from n=3 mice per group. Asterisk indicates significant differences between the indicated experimental groups as calculated by one-way ANOVA: \*,  $p < 0.05$ ; \*\*,  $p < 0.01$ . doi:10.1371/journal.pone.0025414.g003

CSF is close to that (60%) afforded by treatment with live LBNSE-GM-CSF although the VNA titers in mice treated with the latter (about 7 IU) are much higher. The high level of VNA induced by LBNSE-GM-CSF is likely due to the activation of the innate immune responses such as expression of chemokines/cytokines and the recruitment/activation of DCs as reported previously [15,16] and demonstrated in the present study. We have consistently observed that infection with street RABV by either ic [13] or im [17,31] fails to stimulate the innate immune responses while laboratory-adapted RABV induces quick and high level of

such responses including expression of innate immune molecules in and infiltration of inflammatory cells into the CNS. Infection with DRV stimulated the expression of innate immune genes only at the late stage of the infection, but did not induce infiltration of inflammatory cells. As a consequence, enhancement of BBB was only observed at 9 dpi and only in the spinal cord. In addition, the adaptive immune responses (VNA titers) in mice infected with DRV are significantly lower than those in mice infected with laboratory-adapted RABV. This is not surprising since it has been reported that only 20% rabid patients have detectable VNA at the time of death [32]. Roy et al [18] reported that infection with street RABV induced similar levels of innate and adaptive immune responses in mice as laboratory-adapted RABV. However, infection with street RABV failed to enhance the BBB permeability and thus the immune effectors could not gain entry into the CNS to clear the virus. The discrepancies between these studies could be due to differences in the virus doses used. We consistently infect animals with 10 IMLD<sub>50</sub> or ICLD<sub>50</sub> [13,17] and Roy et al [18] infected mice with virus titers as titrated in cell culture (FFUs). Since we have reported that street RABV is at least 1000 times more virulent than the laboratory-adapted RABV, and thus it requires more virus (FFU) for laboratory-adapted RABV to kill the infected mice [13]. Although infection with high doses of street RABV induced comparable adaptive immunity (VNA) as the laboratory-adapted RABV in the periphery, it may not have stimulated chemokine expression in time to enhance the BBB permeability. Thus, enhancement of BBB permeability and the development of RABV-specific immunity, i.e. VNA, are the two major factors contributing to the clearance of RABV from the CNS and the protection of mice from developing rabies.

Over-expression of chemokines/cytokines in RABV not only enhances the BBB permeability, but also increases the adaptive immune responses. Previously it was found that immunization with rRABV expressing MIP-1 $\alpha$ , MDC, or GM-CSF induced significantly more VNA responses in mice, which led to better protection than with the parent virus when challenged with virulent RABV [15,16]. The increased immunogenicity is due to recruitment/activation of DCs. Indeed, direct ic administration of LBNSE-GM-CSF into the CNS recruited/activated DCs in the periphery. Not only significantly more CD11c+ cells, but also higher geometric mean fluorescence of the CD80 and CD86 expression, were detected in the lymph nodes and blood of mice treated with LBNSE-GM-CSF than in sham-treated mice or in mice treated with UV-inactivated LBNSE-GM-CSF. Recruitment/activation of DCs resulted in significantly more activation of B cells in the CNS of mice treated with LBNSE-GM-CSF than in sham-treated mice or mice treated with UV-inactivated LBNSE-GM-CSF. It has been hypothesized that it is the VNA produced in situ (CNS) by invading B cells, rather than those produced in the periphery and then transported into the CNS, that are protective [33]. In our study, direct ic administration of UV-inactivated LBNSE-GM-CSF did not provide better protection than sham-treatment despite the fact that VNA was induced in the periphery. Very few B cells were detected in the CNS. However, treatment with UV-inactivated LBNSE-GM-CSF together with administration of MCP-1 improved the rate of survival to the level similar to

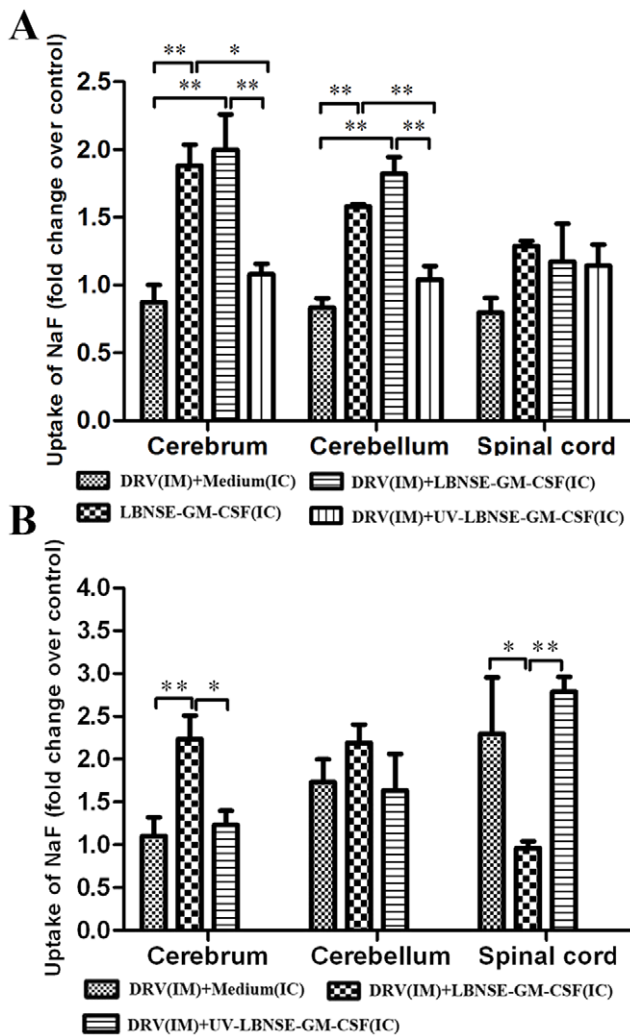

**Figure 4. Induction of BBB permeability after treatment with LBNSE-GM-CSF.** Mice were treated with medium or 10<sup>7</sup> FFU LBNSE-GM-CSF at 0 (A) or 4 (B) dpi. BBB permeability was determined by uptake of sodium fluorescein at day 6 post treatment. Data are given as mean values + SEM. Asterisks indicate significant differences between the indicated experimental groups: \*,  $p < 0.05$ ; \*\*,  $p < 0.01$ . doi:10.1371/journal.pone.0025414.g004



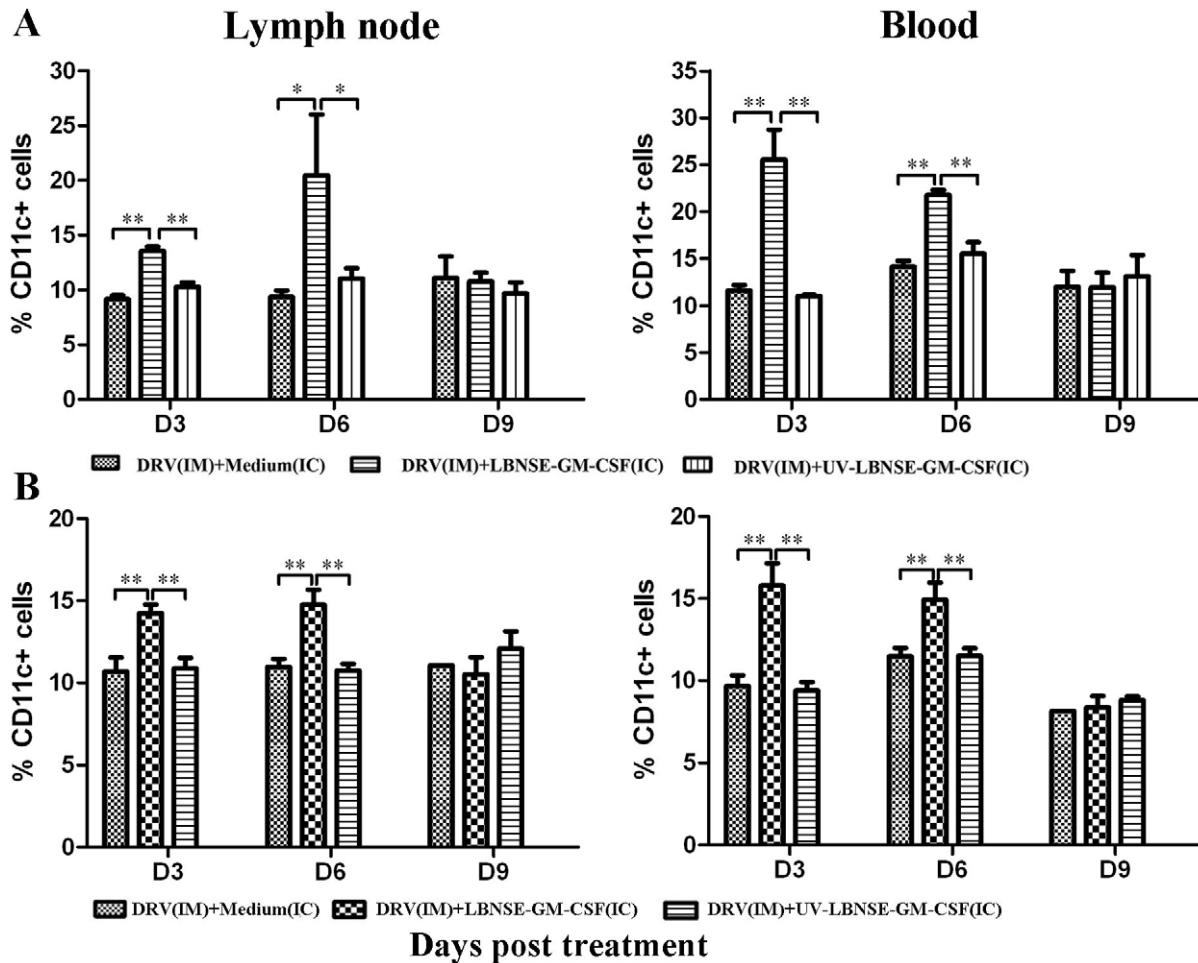

**Figure 5. Recruitment/activation of DCs in the lymph node and periphery blood of mice treated with LBNSE-GM-CSF.** BALB/c mice were infected with 10 IMLD<sub>50</sub> DRV and treated at 0 (A) or 4 (B) dpi with medium, 10<sup>7</sup> FFU live or inactivated LBNSE-GM-CSF. At days 3, 6, and 9 post treatment, single cell suspensions were prepared from inguinal lymph node or peripheral blood and stained with antibodies against surface markers of DCs (CD11c+). The stained cells were analyzed by flow cytometry. All data are from n=3 mice in each group and presented as mean values ± standard errors (SE). Asterisk indicates significant differences between the indicated experimental groups as calculated by one-way ANOVA: \*,  $p < 0.05$ ; \*\*,  $p < 0.01$ .

doi:10.1371/journal.pone.0025414.g005

that in mice treated with live LBNSE-GM-CSF. It is not known whether administration of MCP-1 allowed VNA and/or B cells enter into the CNS and thus future studies are warranted.

Traditional inactivated RABV vaccines have been used for pre- and post-exposure prophylaxis for humans with high safety and efficacy [34,35,36]. However, multiple doses are needed to stimulate adequate immunity, thus driving up the cost and preventing wide distribution of these vaccines, particularly in the developing countries [2]. Furthermore, inactivated RABV vaccines cannot be used for delayed treatment since they may accelerate the development of rabies [12]. Live attenuated RABV and recombinant live vaccinia virus expressing RABV G (VRG) have been so far limited to immunization of wildlife animals [37,38,39]. Recently, it has been shown that live-attenuated RABV, particularly those expressing multiple copies of RABV G or immune stimulating molecules, can further attenuate viral virulence and at the same time enhance the immunogenicity [14,15,16,25,40], suggesting that live-attenuated RABV (expressing multiple copies of the G or immune stimulatory molecules) could be developed as RABV vaccines for pre- and post-exposure prophylaxis. Indeed, Wu et al [34] reported that co-administration

of live-attenuated RABV and street RABV can protect mice and hamsters from developing rabies. Furthermore, Faber et al [24] reported that 50% of the mice survived the infection with a street RABV when given a recombinant RABV expressing three copies of the G as late as 4 dpi. In this study, significantly more mice were protected when recombinant RABV expressing GM-CSF was given as late as 5 dpi. Most importantly, these live recombinant RABV can enhance the BBB permeability, allowing innate as well as RABV-specific immunity to enter the CNS to clear RABV as shown previously [24] as well as in this present study. Therefore, these commodities may have practical implications in treatment of clinical rabies. Further studies are needed to address if such treatment is effective at the time of clinical diseases in a more suitable animal model.

## Materials and Methods

### Ethics Statement

This study was carried out in strict accordance with the recommendations in the Guide for the Care and Use of Laboratory Animals of the National Institutes of Health. All animal experiments

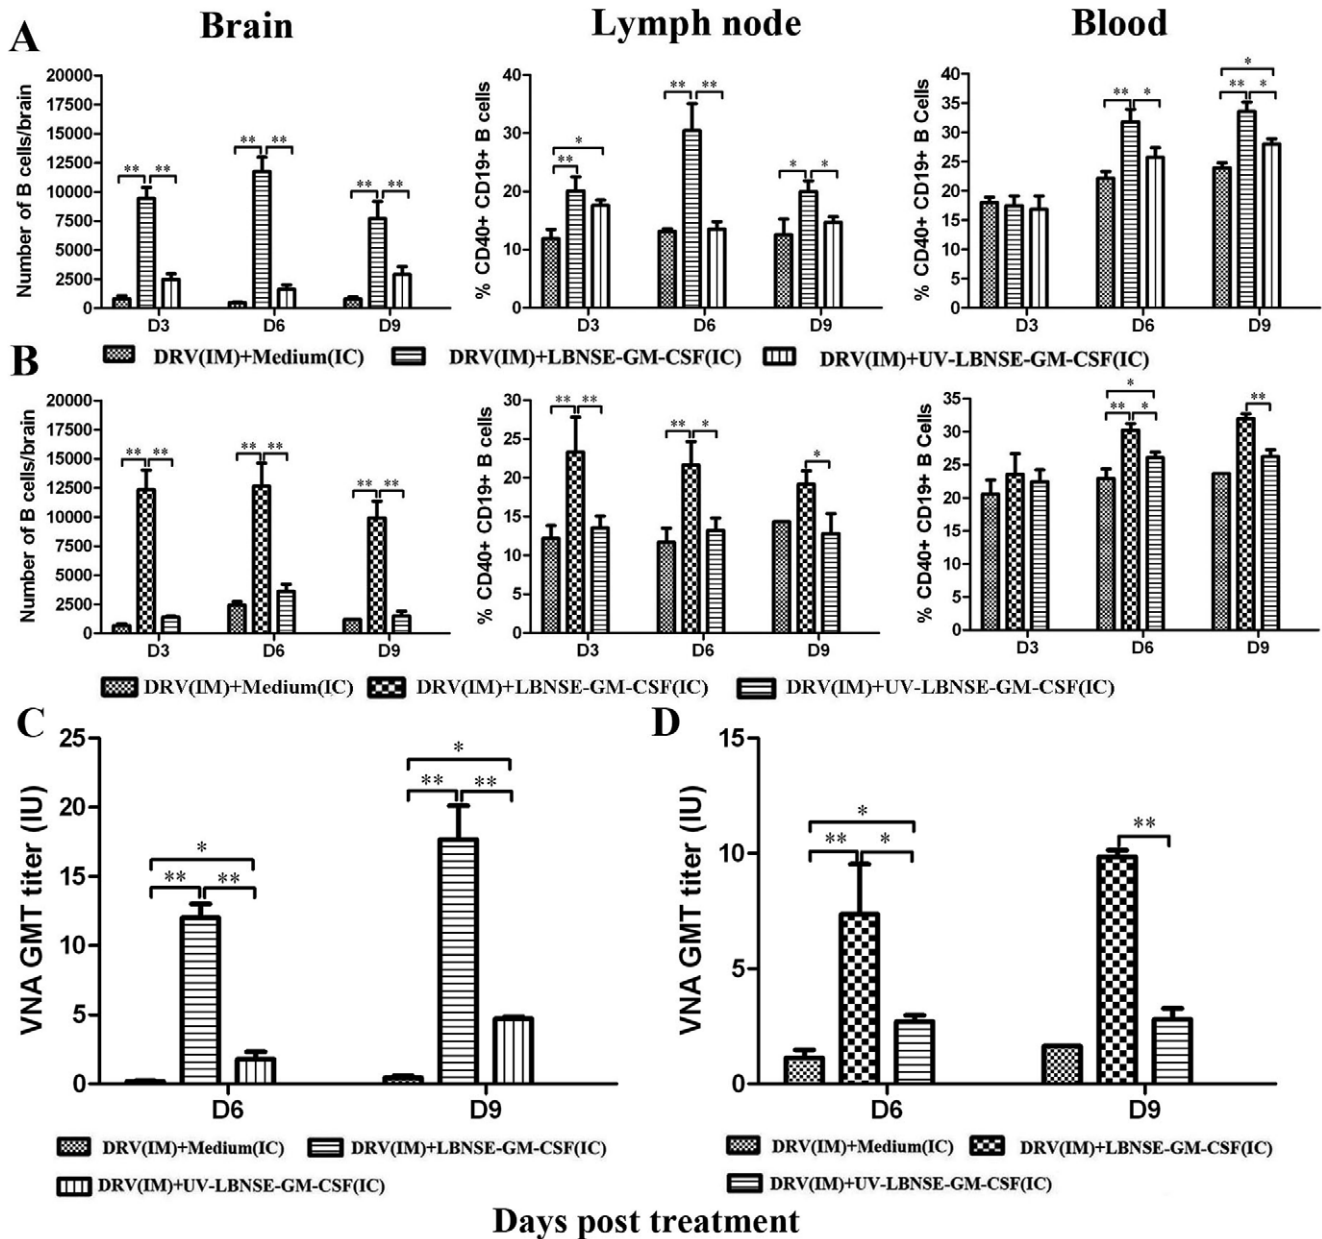

**Figure 6. Recruitment/activation of B cells in the CNS and the periphery and the production of VNA in mice treated with LBNSE-GM-CSF.** BALB/c mice were infected with  $10^7$  IMLD<sub>50</sub> DRV and treated at 0 (A, C) or 4 (B, D) dpi with medium,  $10^7$  FFU live or inactivated LBNSE-GM-CSF. Brain, lymph node and peripheral blood were harvested at days 3, 6, and 9 post treatments. Leukocytes recovered from CNS by Percoll centrifugation or signal-cell suspensions prepared from the lymph node or peripheral blood were stained with antibodies against B cell markers (CD40 and CD19). The stained cells were analyzed by flow cytometry. The number of B cells in the brain and the percentage of mature B cells in the lymph node or blood were presented in mice treated at 0 (A) or 4 (B) dpi. Blood samples were collected at days 6 and 9 post treatment and VNA titers determined by RFFIT (C for VNA in mice treated at 0 and D at 4 dpi). All data are from n=3 mice in each group and presented as mean values + standard errors (SE). Asterisk indicates significant differences between the indicated experimental groups as calculated by one-way ANOVA: \*,  $p < 0.05$ ; \*\*,  $p < 0.01$ .  
doi:10.1371/journal.pone.0025414.g006

were carried out as approved by the Institutional Animal Care and Use Committee, University of Georgia (AUP # A2009 5–103, animal welfare assurance no. A3085-01). All efforts were made to minimize animal suffering.

**Cells, viruses, antibodies, and animals**

BSR cells, a cloned cell line derived from BHK-21, were maintained in Dulbecco’s modified Eagle’s medium (Mediatech, Herndon, VA) supplemented with 10% fetal bovine serum (FBS)

(Gibco, Grand Island, NY). Mouse neuroblastoma cells (NA) were maintained in RMPI 1640 medium (Mediatech) containing 10% FBS. Recombinant RABV expressing GM-CSF [LBNSE-GM-CSF) was constructed as described [16]. Street RABV (DRV) 41] (Mexico-origin, data not published) was propagated in suckling mouse brains. Challenge virus standard (CVS)-11 was propagated in NA cells. Fluorescein isothiocyanate (FITC)-conjugated antibody against the RABV N protein was purchased from Fujirebio (Melvin, PA). Antibodies used for flow cytometric analysis, such as

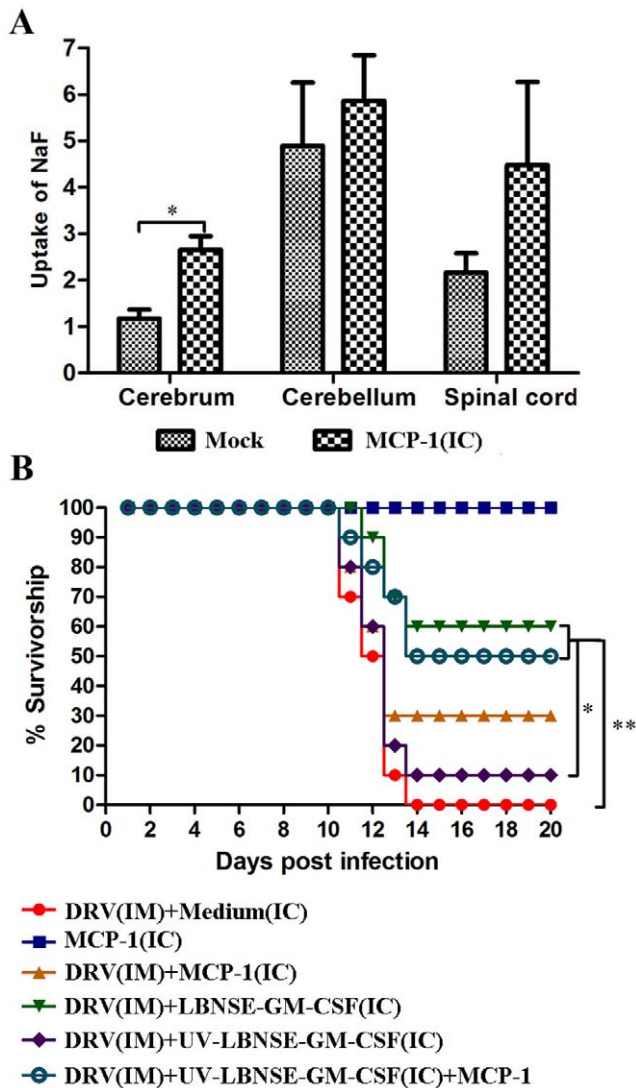

**Figure 7. Enhancement of BBB permeability induced by MCP-1 improves protection in mice treated with UV-inactivated rRABV.** Mice were treated with medium or MCP-1 (25  $\mu$ g) by ic, BBB permeability was determined by uptake of sodium fluorescein at day 2 post treatment (A). ICR mice (group of 10) at age of 4–6 weeks were infected i.m. with 10 IMLD<sub>50</sub> DRV, and then treated with medium, MCP-1 (25  $\mu$ g), 10<sup>7</sup> FFU LBNSE-GM-CSF, UV-inactivated LBNSE-GM-CSF (equivalent to 10<sup>7</sup> FFU) or a mixture of MCP-1 (25  $\mu$ g) and UV-inactivated LBNSE-GM-CSF (equivalent to 10<sup>7</sup> FFU) by ic at day 4 post infection. The mice were observed for 20 days post infection, and survivorship was recorded and analyzed. Asterisk indicates significant differences between the indicated experimental groups as calculated by one-way ANOVA or Log-rank test: \*,  $p < 0.05$ ; \*\*,  $p < 0.01$ . doi:10.1371/journal.pone.0025414.g007

anti-CD3 (clone 17A2), anti-Ly6G (clone RB6-8C5), anti-CD45 (clone 30-F11), anti-CD11b (clone M1/70), anti-CD11c (clone HL3), anti-CD80 (clone 16-10A1), anti-CD86 (clone GL1) and anti-CD40 (clone 3/23) were purchased from BD Pharmingen (San Jose, CA). Anti-CD19 antibody (clone 1D3) was purchased from eBioscience (San Diego, CA). Recombinant murine MCP-1 was purchased from PreproTech (Rocky Hill, NJ). Female BALB/c and ICR mice were purchased from Harlan and housed in temperature- and light-controlled quarters in the Animal Resources Facility, College of Veterinary Medicine, University of Georgia. At indicated time points, mice were anesthetized with

ketamine-xylazine at a dose of 0.1 ml/10 g body weight and then perfused by intracardiac injection of PBS followed by 10% neutral buffered formalin as described previously [42]. Brain tissues were collected for respective studies.

### Virus titration

Mouse brains were homogenized in phosphate-buffered saline (PBS) (10 ml/g tissue). After homogenization and centrifugation, the supernatants were harvested, aliquoted and stored at -80°C until use. Viruses were titrated by direct fluorescent antibody assay (dFA) in NA cells. NA cells in 96-well plate were inoculated with serial 10-fold dilutions of supernatant and incubated at 34°C for 2 days. The culture supernatant was removed and the cells were fixed with 80% ice-cold acetone for 30 min. The cells were then stained with FITC-conjugated anti-RABV N antibodies. Antigen-positive foci were counted under a fluorescent microscope (Zeiss, Germany) and viral titers were calculated as fluorescent focus units (FFU) per milliliter. All titration were carried out in quadruplicate.

### Quantitative real-time RT-PCR (qRT-PCR)

To quantify the expression of chemokines/cytokines, a real time SYBR Green PCR assay was carried out in an Mx3000P apparatus (Stratagene, La Jolla, CA). Brain tissues were removed from infected mice after perfusion at indicated time points, and flash frozen on dry ice before being stored at -80°C. Total RNA was extracted with Trizol and used for qRT-PCR as described previously [13]. Each reaction was carried out in duplicate with approximately 100 ng of DNase-treated RNA and 5 nM each primer pairs described previously [13] by using a One-Step Brilliant II SYBR green qRT-PCR master mix kit (Stratagene, La Jolla, CA) according to the manufacturer's instruction. For chemokines/cytokines expression, mRNA copy numbers of a particular gene were normalized to the housekeeping gene glyceraldehyde-3-phosphate dehydrogenase (GAPDH). Levels of gene expression in a test sample are presented as the fold increase over that detected in sham-infected controls.

### Measurement of BBB permeability

BBB permeability was measured using a modification of a previously described technique in which a low-molecular-weight fluorescent marker (Sodium fluorescein; molecular weight, 376) is utilized as a tracer molecule [24]. Briefly, mice received 100  $\mu$ l of 100 mg/ml sodium fluorescein intravenously under anesthesia. After 10 min circulation for sodium fluorescein, peripheral blood was collected and mice were perfused with PBS for 10 min. Serum (50  $\mu$ l) was recovered and mixed with an equal volume of 15% trichloroacetic acid (TCA). After centrifugation for 10 min at 10,000 $\times$ g, the supernatant was harvested. Spinal cord or brain tissues were homogenized in 7.5% TCA and centrifuged for 10 min at 10,000 $\times$ g to remove insoluble precipitates. After the addition of 30  $\mu$ l 5 M NaOH to 120  $\mu$ l supernatant, the fluorescence was determined using a BioTek Spectrophotometer (Bio-Tek Instruments Inc, Winooski, VT) with excitation at 485 nm and emission at 530 nm. Sodium fluorescein taken up into tissue is expressed as ( $\mu$ g fluorescence in cerebrum/mg tissue)/( $\mu$ g fluorescence/ml sera) to normalize uptake values of the dye for blood levels of the dye at the time of tissue collection.

### Leukocyte isolation from CNS, lymph nodes, and the blood for flow cytometry

Mouse brains were harvested and digested with 1  $\mu$ g/ $\mu$ l DNase I (Sigma-Aldrich), 2  $\mu$ g/ $\mu$ l collagenase D (Worthington Biochemical Corporation, Lakewood, NJ) in Hanks balanced salt solution

(with  $\text{Ca}^{2+}$  and  $\text{Mg}^{2+}$ ) for 1 h to disperse the tissue into single-cell suspension. Viable cells were separated by discontinuous Percoll gradient (70/30%) centrifugation ( $650\times g$ , 25 min). After being washed once with Hanks balanced salt solution (without  $\text{Ca}^{2+}$  and  $\text{Mg}^{2+}$ ) and counted, cells were stained for antibodies against CD3, Ly6G, CD45, CD11b and CD19 at  $4^\circ\text{C}$  for 30 min and then fixed with 1% paraformaldehyde for flow cytometry.

Cervical lymph nodes and blood were collected and red blood cells were lysed by ammonium chloride lysing solution (150 mM  $\text{NH}_4\text{Cl}$ , 10 mM  $\text{NaHCO}_3$ , 1 mM EDTA). Single-cell suspensions were then prepared at  $10^6$  cells in PBS containing 2% FBS and 0.1%  $\text{NaN}_3$  and stained with antibodies against CD40, CD19, CD11b, CD11c, CD80 and CD86 for 30 min at  $4^\circ\text{C}$ . Data were acquired on LSR-II flow cytometer (BD Bioscience), and analyzed using BD FACSDiva (BD Pharmingen) or FlowJo software (Tree Star).

### Rapid fluorescent focus inhibition test (RFFIT)

Blood was collected for measurement of VNA using the RFFIT as described previously [20]. Briefly, 50  $\mu\text{l}$  of serial five-fold dilutions of serum were prepared in Lab-Tek Chamber slides

(Nalge Nunc International, Rochester, NY). Fifty  $\text{FFD}_{50}$  (50% Fluorescing Foci dose) of CVS-11 was added to each chamber and incubated for 90 min at  $37^\circ\text{C}$ . NA cells ( $10^5$  cells) were added into each chamber and the slides were incubated at  $37^\circ\text{C}$  for 20 hr. Then the cells were fixed with ice-cold 80% acetone and stained with FITC-conjugated anti-RABV N antibodies for 1 hr at  $37^\circ\text{C}$ . Twenty fields in each chamber were observed under a fluorescent microscope, and the 50% endpoint titers were calculated according to the Reed-Meunch formula [43]. The values were compared with that of the reference serum (obtained from the National Institute for Biological Standards and Control, Herts, UK) and normalized to international units (IU/ml).

**Statistical Analyses.** Statistical significance of the differences between groups was determined using one-way ANOVA or Log-rank test.

### Author Contributions

Conceived and designed the experiments: ZFF. Performed the experiments: HW GZ YW. Analyzed the data: ZFF HW SY XX. Wrote the paper: HW ZFF.

### References

- Meslin FX, Fishbein DB, Matter HC (1994) Rationale and prospects for rabies elimination in developing countries. *Curr Top Microbiol Immunol* 187: 1–26.
- Knobel DL, Cleaveland S, Coleman PG, Fevre EM, Meltzer MI, et al. (2005) Re-evaluating the burden of rabies in Africa and Asia. *Bull World Health Organ* 83: 360–368.
- Fu ZF (1997) Rabies and rabies research: past, present and future. *Vaccine* 15 Suppl. pp S20–24.
- Lackay SN, Kuang Y, Fu ZF (2008) Rabies in small animals. *Vet Clin North Am Small Anim Pract* 38: 851–861. ix.
- Nigg AJ, Walker PL (2009) Overview, prevention, and treatment of rabies. *Pharmacotherapy* 29: 1182–1195.
- Blanton JD, Palmer D, Rupprecht CE (2010) Rabies surveillance in the United States during 2009. *J Am Vet Med Assoc* 237: 646–657.
- Hattwick MA, Hochberg FH, Landrigan PJ, Gregg MB (1972) Skunk-associated human rabies. *JAMA* 222: 44–47.
- CDC (2003) First human death associated with raccoon rabies—Virginia, 2003. *MMWR Morb Mortal Wkly Rep* 52: 1102–1103.
- Rupprecht CE, Smith JS, Krebs JW, Childs JE (1997) Molecular epidemiology of rabies in the United States: reemergence of a classical neurotropic agent. *J Neurovirol* 3 Suppl 1: S52–53.
- Morimoto K, Patel M, Corisdeo S, Hooper DC, Fu ZF, et al. (1996) Characterization of a unique variant of bat rabies virus responsible for newly emerging human cases in North America. *Proc Natl Acad Sci U S A* 93: 5653–5658.
- WHO (2010) Fact Sheet No. 99.
- Rupprecht CE, Hanlon CA, Hemachudha T (2002) Rabies re-examined. *Lancet Infect Dis* 2: 327–343.
- Wang ZW, Sarmiento L, Wang Y, Li XQ, Dhingra V, et al. (2005) Attenuated rabies virus activates, while pathogenic rabies virus evades, the host innate immune responses in the central nervous system. *J Virol* 79: 12554–12565.
- Zhao L, Toriumi H, Kuang Y, Chen H, Fu ZF (2009) The roles of chemokines in rabies virus infection: overexpression may not always be beneficial. *J Virol* 83: 11808–11818.
- Zhao L, Toriumi H, Wang H, Kuang Y, Guo X, et al. (2010) Expression of MIP-1 $\alpha$  (CCL3) by a Recombinant Rabies Virus Enhances Its Immunogenicity by Inducing Innate Immunity and Recruiting Dendritic Cells and B Cells. *J Virol* 84: 9642–9648.
- Wen Y, Wang H, Wu H, Yang F, Tripp RA, et al. (2011) Rabies virus expressing dendritic cell-activating molecules enhances the innate and adaptive immune response to vaccination. *J Virol* 85: 1634–1644.
- Kuang Y, Lackay SN, Zhao L, Fu ZF (2009) Role of chemokines in the enhancement of BBB permeability and inflammatory infiltration after rabies virus infection. *Virus Res* 144: 18–26.
- Roy A, Phares TW, Koprowski H, Hooper DC (2007) Failure to open the blood-brain barrier and deliver immune effectors to central nervous system tissues leads to the lethal outcome of silver-haired bat rabies virus infection. *J Virol* 81: 1110–1118.
- Roy A, Hooper DC (2007) Lethal silver-haired bat rabies virus infection can be prevented by opening the blood-brain barrier. *J Virol* 81: 7993–7998.
- Smith JS, Yager, P. A, Baer, M G (1996) A rapid fluorescence focus inhibition test (RFFIT) for determining rabies virus-neutralising antibody. In: Meslin F-X, Kaplan MM, Koprowski H, eds. *Laboratory Techniques in Rabies*, 4th ed 181–192.
- Barker CF, Billingham RE (1977) Immunologically privileged sites. *Adv Immunol* 25: 1–54.
- Hosking MP, Lane TE (2010) The role of chemokines during viral infection of the CNS. *PLoS Pathog* 6: e1000937.
- Kim JV, Kang SS, Dustin ML, McGavern DB (2009) Myelomonocytic cell recruitment causes fatal CNS vascular injury during acute viral meningitis. *Nature* 457: 191–195.
- Phares TW, Fabis MJ, Brimer CM, Kean RB, Hooper DC (2007) A peroxynitrite-dependent pathway is responsible for blood-brain barrier permeability changes during a central nervous system inflammatory response: TNF- $\alpha$  is neither necessary nor sufficient. *J Immunol* 178: 7334–7343.
- Faber M, Li J, Kean RB, Hooper DC, Alugupalli KR, et al. (2009) Effective preexposure and postexposure prophylaxis of rabies with a highly attenuated recombinant rabies virus. *Proc Natl Acad Sci U S A* 106: 11300–11305.
- Merrill JE, Murphy SP (1997) Inflammatory events at the blood brain barrier: regulation of adhesion molecules, cytokines, and chemokines by reactive nitrogen and oxygen species. *Brain Behav Immun* 11: 245–263.
- Stanimirovic D, Satoh K (2000) Inflammatory mediators of cerebral endothelium: a role in ischemic brain inflammation. *Brain Pathol* 10: 113–126.
- Stamatovic SM, Shaku P, Keep RF, Moore BB, Kunkel SL, et al. (2005) Monocyte chemoattractant protein-1 regulation of blood-brain barrier permeability. *J Cereb Blood Flow Metab* 25: 593–606.
- Prehaud C, Megret F, Lafage M, Lafon M (2005) Virus infection switches TLR-3-positive human neurons to become strong producers of beta interferon. *J Virol* 79: 12893–12904.
- Johnson N, McKimmie CS, Mansfield KL, Wakeley PR, Brookes SM, et al. (2006) Lyssavirus infection activates interferon gene expression in the brain. *J Gen Virol* 87: 2663–2667.
- Sarmiento L, Li XQ, Howerth E, Jackson AC, Fu ZF (2005) Glycoprotein-mediated induction of apoptosis limits the spread of attenuated rabies viruses in the central nervous system of mice. *J Neurovirol* 11: 571–581.
- Hemachudha T, Phanuphak P, Sriwanthana B, Manusathit S, Phanthumchinda K, et al. (1988) Immunologic study of human encephalitic and paralytic rabies. Preliminary report of 16 patients. *Am J Med* 84: 673–677.
- Hooper DC, Phares TW, Fabis MJ, Roy A (2009) The production of antibody by invading B cells is required for the clearance of rabies virus from the central nervous system. *PLoS Negl Trop Dis* 3: e335.
- Sudarshan MK, Madhusudana SN, Mahendra BJ (1999) Post-exposure prophylaxis with purified vero cell rabies vaccine during pregnancy—safety and immunogenicity. *J Commun Dis* 31: 229–236.
- Sampath G, Parikh S, Sangram P, Briggs DJ (2005) Rabies post-exposure prophylaxis in malnourished children exposed to suspect rabid animals. *Vaccine* 23: 1102–1105.
- Dietschold B, Hooper DC (1998) Human diploid cell culture rabies vaccine (HDCV) and purified chick embryo cell culture rabies vaccine (PCECV) both confer protective immunity against infection with the silver-haired bat rabies virus strain (SHBRV). *Vaccine* 16: 1656–1659.
- Brochier B, Kieny MP, Costy F, Coppens P, Bauduin B, et al. (1991) Large-scale eradication of rabies using recombinant vaccinia-rabies vaccine. *Nature* 354: 520–522.
- Hanlon CA, Nieczoda M, Hamir AN, Schumacher C, Koprowski H, et al. (1998) First North American field release of a vaccinia-rabies glycoprotein recombinant virus. *J Wildl Dis* 34: 228–239.

39. Schumacher CL, Coulon P, Lafay F, Benjean J, Aubert MF, et al. (1993) SAG-2 oral rabies vaccine. *Onderstepoort J Vet Res* 60: 459–462.
40. Wu X, Franka R, Henderson H, Rupprecht CE (2011) Live attenuated rabies virus co-infected with street rabies virus protects animals against rabies. *Vaccine* 29: 4195–4201.
41. Dietzschold B, Morimoto K, Hooper DC, Smith JS, Rupprecht CE, et al. (2000) Genotypic and phenotypic diversity of rabies virus variants involved in human rabies: implications for postexposure prophylaxis. *J Hum Virol* 3: 50–57.
42. Li XQ, Sarmiento L, Fu ZF (2005) Degeneration of neuronal processes after infection with pathogenic, but not attenuated, rabies viruses. *J Virol* 79: 10063–10068.
43. Reed LJ, Muench H (1938) A simple method of estimating fifty percent end points. *Am J Hyg.* pp 493–497.
